# Supplementary material for: Multiomics analysis of rheumatoid arthritis yields sequence variants that have large effects on risk of the seropositive subset
Source: PubMed Central journal article supplement — Ann Rheum Dis. 2022 Apr 25;81(8):1085–95. doi: 10.1136/annrheumdis-2021-221754 (PMC9279832; doi:10.1136/annrheumdis-2021-221754), 2022-04-25
Supplement: annrheumdis-2021-221754supp001.pdf [file annrheumdis-2021-221754supp001.pdf]

## Supplementary Information 1 for co-author list

### Members of the DBDS Genomic Consortium:

Steffen Andersen<sup>1</sup>  
Karina Banasik<sup>2</sup>  
Søren Brunak<sup>2</sup>  
Kristoffer Burgdorf<sup>3</sup>  
Christian Erikstrup<sup>4</sup>  
Thomas Folkmann Hansen<sup>5</sup>  
Henrik Hjalgrim<sup>6</sup>  
Gregor Jemec<sup>7</sup>  
Poul Jennum<sup>8</sup>  
Pär Ingemar Johansson<sup>3</sup>  
Kasper Rene Nielsen<sup>9</sup>  
Mette Nyegaard<sup>10</sup>  
Mie Topholm Brun<sup>11</sup>  
Ole Birger Pedersen<sup>12</sup>  
Susan Mikkelsen<sup>13</sup>  
Khoa Manh Dinh<sup>13</sup>  
Erik Sørensen<sup>3</sup>  
Henrik Ullum<sup>3</sup>  
Sisse Rye Ostrowski<sup>3</sup>  
Thomas Werge<sup>14</sup>  
Daniel Gudbjartsson<sup>15</sup>  
Kari Stefansson<sup>15</sup>  
Hreinn Stefánsson<sup>15</sup>  
Unnur Þorsteinsdóttir<sup>15</sup>  
Margit Anita Hørup Larsen<sup>3</sup>  
Maria Didriksen<sup>3</sup>  
Susanne Sækmose<sup>16</sup>

### Affiliations:

- <sup>1</sup> Department of Finance Copenhagen Business School Copenhagen Denmark  
<sup>2</sup> Novo Nordisk Foundation Center for Protein Research Faculty of Health and Medical Sciences University of Copenhagen Copenhagen Denmark  
<sup>3</sup> Department of Clinical Immunology Copenhagen University Hospital Copenhagen Denmark  
<sup>4</sup> Department of Clinical Immunology Aarhus University Hospital Aarhus Denmark  
<sup>5</sup> Danish Headache Center Department of Neurology Rigshospitalet Glostrup Denmark  
<sup>6</sup> Department of Epidemiology Research Statens Serum Institut Copenhagen Denmark  
<sup>7</sup> Department of Clinical Medicine Zealand University Hospital Roskilde Denmark  
<sup>8</sup> Department of Clinical Neurophysiology at University of Copenhagen Copenhagen Denmark  
<sup>9</sup> Department of Clinical Immunology Aalborg University Hospital Aalborg Denmark  
<sup>10</sup> Department of Biomedicine Aarhus University Denmark  
<sup>11</sup> Department of Clinical Immunology Odense University Hospital Odense Denmark  
<sup>12</sup> Department of Clinical Immunology Zealand University Hospital, Køge Denmark  
<sup>13</sup> Department of Clinical Immunology Aarhus University Hospital Aarhus Denmark  
<sup>14</sup> Institute of Biological Psychiatry Mental Health Centre Sct. Hans Copenhagen University Hospital Roskilde Denmark  
<sup>15</sup> deCODE genetics Reykjavik Iceland  
<sup>16</sup> Department of Clinical Immunology, Zealand University Hospital Køge Denmark

## Supplementary Information 1 for co-author list

### The Danish RA Genetics Working Group

Paal Skytt Andersen<sup>1,2</sup>

Ram Benny Dessau<sup>3</sup>

Malene Rohr Andersen<sup>4</sup>

Hans Jürgen Hoffmann<sup>5</sup>

Claus Lohman Brasen<sup>6</sup>

#### Affiliations:

<sup>1</sup>Microbiology and Infection Control, Statens Serum Institut, Copenhagen, Denmark;

<sup>2</sup>Veterinary Disease Biology, University of Copenhagen, Copenhagen Denmark;

<sup>3</sup>Department of Clinical Microbiology, Slagelse Hospital, Denmark

<sup>4</sup>Department of Clinical Biochemistry, Herlev and Gentofte Hospital, University of Copenhagen, Hellerup, Denmark

<sup>5</sup>Department of Respiratory Diseases B, Institute for Clinical Medicine, Aarhus University Hospital, Aarhus, Denmark;

<sup>6</sup>Department of Biochemistry, Hospital of Lillebaelt, Vejle, Denmark

## Supplementary Information 1 for co-author list

### The Swedish Rheumatology Quality Register Biobank Study Group (SRQb)

Johan Askling<sup>1</sup>

Eva Baecklund<sup>2</sup>

Lena Bjorkman<sup>3</sup>

Alf Kastbom<sup>4</sup>

Solbritt Rantapaa-Dahlqvist<sup>5</sup>

Carl Turesson<sup>6</sup>

#### Affiliations:

<sup>1</sup>Department of Medicine, Solna, Karolinska Institutet, Stockholm, Sweden.

<sup>2</sup>Department of Medical Sciences, Section of Rheumatology, Uppsala University, Uppsala, Sweden

<sup>3</sup>Department of Rheumatology and Inflammation research, Gothenburg University, Gothenburg, Sweden

<sup>4</sup>Department of Biomedical and Clinical Sciences, Linköping University, Linköping, Sweden

<sup>5</sup>Rheumatology, Section of Medicine, Department of Public Health and Clinical Medicine, Umea University, Umea, Sweden

<sup>6</sup>Rheumatology, Department of Clinical Sciences, Malmö, Lund University, Malmö, Sweden

<https://srq.nu/biobank-vardivare/>

#### Swedish rheumatology clinics participating in the SRQb

Karolinska University Hospital

Sahlgrenska University Hospital

Mälars Hospital in Eskilstuna

Falun Hospital

Danderyd Hospital

Kalmar County Hospital

Blekingesjukhuset

Vasteras hospitals

Västervik Hospital

Skaraborg Hospital Skövde

University Hospital, Uppsala,

Linköping University Hospital

Capio Movement in Varberg and Halmstad

Uppsala University Hospital

Örebro University Hospital

Center for Rheumatology in Stockholm,

Skåne University Hospital Malmö
