# Supplementary material for: Multiomics analysis of rheumatoid arthritis yields sequence variants that have large effects on risk of the seropositive subset
Source: PubMed Central journal article supplement — Ann Rheum Dis. 2022 Apr 25;81(8):1085–95. doi: 10.1136/annrheumdis-2021-221754 (PMC9279832; doi:10.1136/annrheumdis-2021-221754), 2022-04-25
Supplement: annrheumdis-2021-221754supp005.pdf [file annrheumdis-2021-221754supp005.pdf]

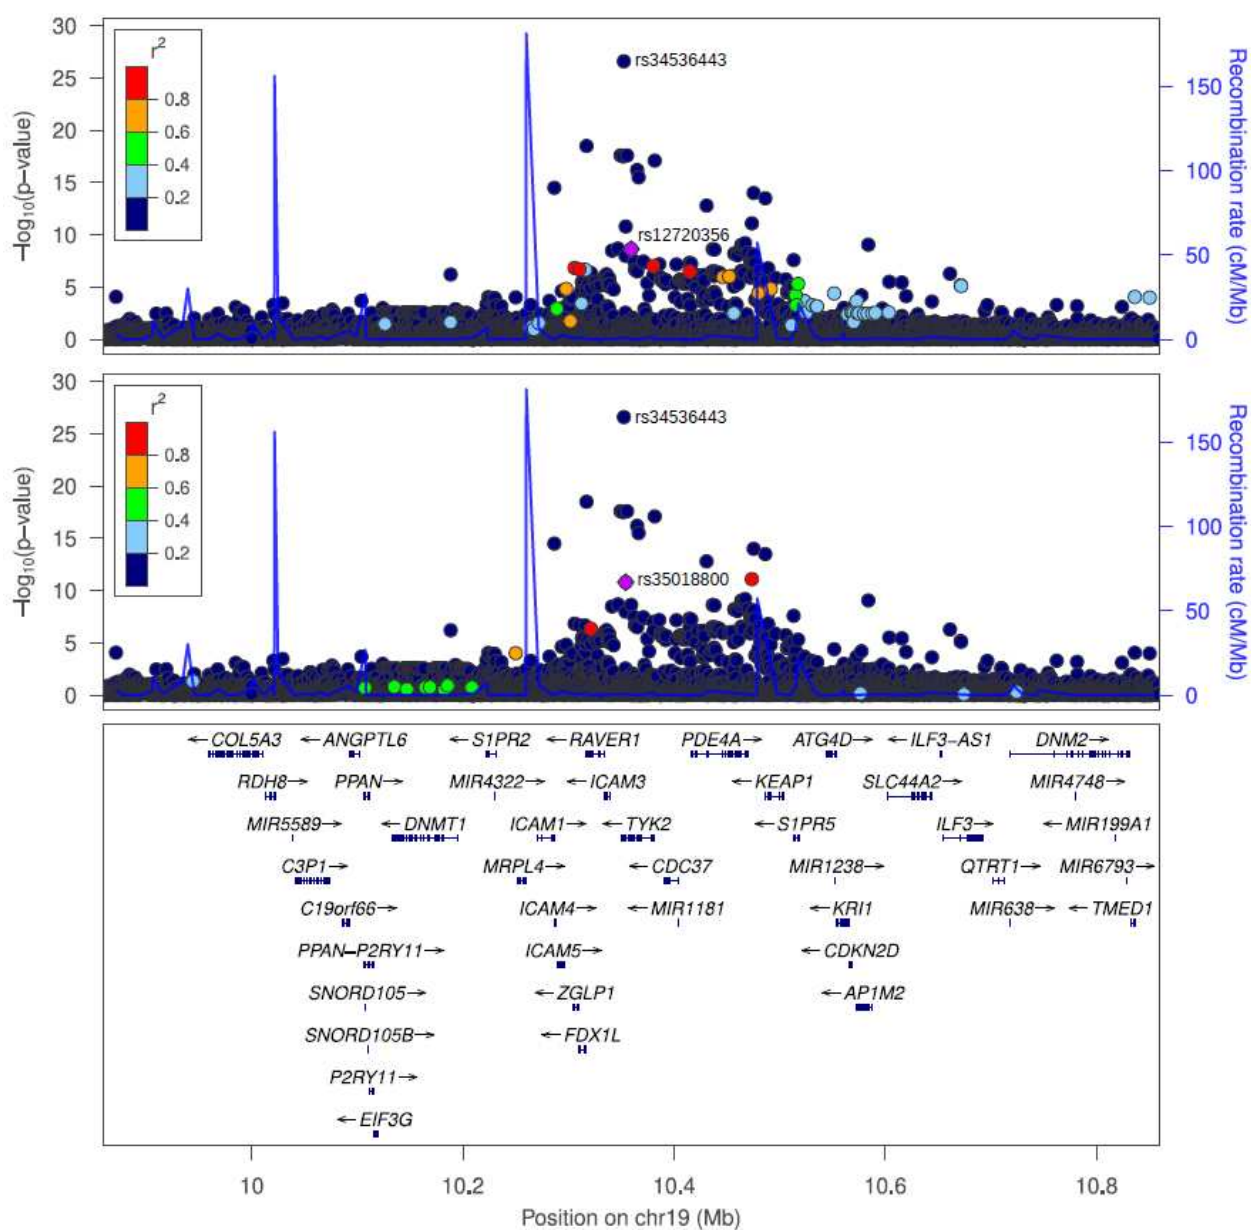

**Supplemental Figure 2.** Locus plot for the association of variants at the *TYK2* locus with seropositive RA. The upper graph highlights the previously unreported missense variant rs12720356 (colored in purple). Other variants are colored by degree of correlation ( $r^2$ ) with rs12720356, including the uncorrelated previously reported missense variant rs34536443. The lower graph highlights the previously unreported missense variant rs35018800 (colored in purple). Other variants are colored by degree of correlation ( $r^2$ ) with rs35018800, including the uncorrelated previously reported missense variant rs34536443.
