# Supplementary material for: Multiomics analysis of rheumatoid arthritis yields sequence variants that have large effects on risk of the seropositive subset
Source: PubMed Central journal article supplement — Ann Rheum Dis. 2022 Apr 25;81(8):1085–95. doi: 10.1136/annrheumdis-2021-221754 (PMC9279832; doi:10.1136/annrheumdis-2021-221754), 2022-04-25
Supplement: annrheumdis-2021-221754supp009.pdf [file annrheumdis-2021-221754supp009.pdf]

Supplementary Table 2. Sequence variants outside the HLA region associated with RA overall, in GWAS meta-analysis on study populations from six Northwestern-European countries (31,313 cases and 995,377 controls)<sup>a</sup>

| Chr   | Position  | rsID*                   | Close gene          | Variant annotation | EA | OA | Sweden      |      |          | Denmark     |      |          | Iceland     |      |          | Norway      |      |          | UK          |      | Finland  |             |      | Combined |             |                  |                  |
|-------|-----------|-------------------------|---------------------|--------------------|----|----|-------------|------|----------|-------------|------|----------|-------------|------|----------|-------------|------|----------|-------------|------|----------|-------------|------|----------|-------------|------------------|------------------|
|       |           |                         |                     |                    |    |    | Freq EA (%) | OR   | P        | OR          | P                | P <sub>het</sub> |
| chr1  | 2800059   | rs897628*               | <b>TTG34</b>        | missense           | T  | C  | 30.22       | 0.92 | 1.18E-03 | 29.36       | 0.96 | 0.0296   | 29.65       | 0.93 | 0.0114   | 31.91       | 0.88 | 0.0253   | 33.62       | 0.96 | 0.063    | 35.00       | 0.91 | 4.82E-05 | <b>0.94</b> | <b>1.87E-10</b>  | 0.302            |
| chr1  | 113834946 | rs2476601               | <b>PTPN22</b>       | missense           | A  | G  | 12.08       | 1.57 | 2.67E-49 | 10.56       | 1.43 | 1.94E-40 | 13.32       | 1.29 | 1.48E-11 | 11.03       | 1.50 | 2.56E-08 | 9.65        | 1.28 | 9.27E-18 | 14.88       | 1.45 | 7.47E-32 | <b>1.41</b> | <b>3.85E-144</b> | 0                |
| chr2  | 191094763 | rs4853458               | <b>STAT4, GLS</b>   | intron             | A  | G  | 23.83       | 1.10 | 1.44E-04 | 21.90       | 1.07 | 2.17E-03 | 20.64       | 1.12 | 6.97E-04 | 21.99       | 1.04 | 0.469    | 22.37       | 1.12 | 5.31E-07 | 23.14       | 1.14 | 7.25E-07 | <b>1.10</b> | <b>2.72E-19</b>  | 0.424            |
| chr2  | 203874196 | rs3087243               | <b>CTLA4</b>        | downstream gene    | A  | G  | 39.35       | 0.89 | 1.07E-07 | 41.52       | 0.91 | 4.52E-07 | 40.04       | 0.95 | 0.0946   | 40.46       | 0.94 | 0.27     | 44.80       | 0.95 | 5.52E-03 | 32.99       | 0.89 | 8.30E-07 | <b>0.92</b> | <b>3.04E-19</b>  | 0.0982           |
| chr3  | 58197909  | rs35677470              | <b>DNASE1L3</b>     | missense           | A  | G  | 6.86        | 1.21 | 7.69E-06 | 7.86        | 1.12 | 6.24E-04 | 7.59        | 1.07 | 0.174    | 6.44        | 1.05 | 0.651    | 7.79        | 1.07 | 0.0573   | 6.11        | 1.06 | 0.228    | <b>1.10</b> | <b>1.81E-08</b>  | 0.21             |
| chr4  | 26089240  | rs932036                | <b>LINC02357</b>    | intergenic         | T  | A  | 27.90       | 1.13 | 1.69E-07 | 28.89       | 1.05 | 7.47E-03 | 25.99       | 1.11 | 9.98E-04 | 27.05       | 1.13 | 0.0282   | 29.95       | 1.10 | 6.80E-06 | 28.37       | 1.08 | 1.50E-03 | <b>1.09</b> | <b>6.65E-18</b>  | 0.29             |
| chr5  | 56148856  | rs7731626               | <b>ANKRD55</b>      | intron             | A  | G  | 34.86       | 0.87 | 3.43E-09 | 35.34       | 0.88 | 7.22E-11 | 39.14       | 0.88 | 9.08E-06 | 36.44       | 0.82 | 1.47E-04 | 36.69       | 0.88 | 3.37E-10 | 27.83       | 0.88 | 5.61E-07 | <b>0.88</b> | <b>1.09E-39</b>  | 0.827            |
| chr6  | 137678425 | rs35926684, rs397886367 | .                   | regulatory region  | G  | GA | 23.61       | 1.15 | 1.97E-08 | 22.63       | 1.07 | 1.60E-03 | 20.31       | 1.08 | 0.0244   | 24.18       | 1.12 | 0.0407   | 22.69       | 1.08 | 5.13E-04 | 20.86       | 1.05 | 0.0527   | <b>1.09</b> | <b>1.48E-14</b>  | 0.19             |
| chr6  | 167127770 | rs3093017               | <b>CCR6</b>         | intron             | C  | G  | 45.47       | 1.10 | 5.70E-06 | 45.12       | 1.05 | 7.47E-03 | 46.27       | 1.07 | 0.0135   | 45.98       | 1.17 | 2.03E-03 | 43.37       | 1.04 | 0.07     | 44.77       | 1.13 | 1.22E-07 | <b>1.07</b> | <b>7.04E-15</b>  | 0.0153           |
| chr7  | 50313596  | rs10261758*             | <b>IKZF1</b>        | intron             | G  | A  | 33.46       | 1.05 | 0.029    | 31.17       | 1.04 | 0.0555   | 31.04       | 1.05 | 0.104    | 31.02       | 1.15 | 0.0108   | 28.82       | 1.12 | 1.24E-08 | 38.40       | 1.07 | 0.00251  | <b>1.07</b> | <b>3.56E-12</b>  | 0.0563           |
| chr7  | 128938247 | rs2004640*              | <b>IRF5</b>         | splice donor       | G  | T  | 46.83       | 0.93 | 5.32E-04 | 48.75       | 0.96 | 0.0142   | 47.26       | 0.92 | 1.20E-03 | 46.81       | 0.95 | 0.342    | 51.20       | 0.93 | 2.49E-04 | 47.89       | 0.93 | 5.36E-04 | <b>0.94</b> | <b>5.11E-13</b>  | 0.752            |
| chr8  | 11480078  | rs2409780               | .                   | regulatory region  | C  | T  | 26.29       | 1.08 | 1.09E-03 | 27.12       | 1.07 | 4.68E-04 | 21.76       | 1.09 | 7.07E-03 | 27.72       | 0.92 | 0.155    | 25.40       | 1.09 | 1.18E-04 | 25.85       | 1.09 | 7.34E-04 | <b>1.08</b> | <b>1.29E-12</b>  | 0.153            |
| chr8  | 100265412 | rs1660322*              | <b>RNF19A</b>       | intron             | C  | T  | 29.41       | 1.04 | 0.11     | 29.86       | 1.07 | 4.56E-04 | 30.96       | 1.06 | 0.0478   | 29.74       | 1.17 | 2.97E-03 | 31.06       | 1.05 | 0.0164   | 30.25       | 1.10 | 8.22E-05 | <b>1.07</b> | <b>8.65E-11</b>  | 0.24             |
| chr9  | 120873843 | rs10985070              | <b>PHF19, TRAF1</b> | upstream gene      | C  | A  | 46.73       | 1.08 | 3.08E-04 | 46.03       | 1.07 | 2.85E-04 | 44.02       | 1.11 | 2.02E-04 | 45.73       | 1.06 | 0.261    | 43.64       | 1.01 | 0.556    | 48.59       | 1.05 | 0.0181   | <b>1.06</b> | <b>8.69E-10</b>  | 0.0875           |
| chr10 | 6060794   | rs3118471               | <b>IL2RA</b>        | intron             | G  | A  | 34.47       | 1.06 | 0.0141   | 32.25       | 1.09 | 3.37E-06 | 34.12       | 1.02 | 0.532    | 33.48       | 1.09 | 0.108    | 29.67       | 1.06 | 4.79E-03 | 36.42       | 1.10 | 2.53E-05 | <b>1.07</b> | <b>1.72E-12</b>  | 0.259            |
| chr10 | 31122426  | rs1538981               | .                   | regulatory region  | C  | T  | 43.71       | 0.94 | 6.23E-03 | 45.56       | 0.94 | 7.51E-04 | 44.49       | 0.97 | 0.198    | 44.38       | 0.90 | 0.0413   | 48.96       | 0.94 | 7.64E-04 | 40.86       | 0.92 | 3.56E-04 | <b>0.94</b> | <b>9.37E-12</b>  | 0.809            |
| chr11 | 64340005  | rs479777*               | <b>CCDC88B</b>      | upstream gene      | C  | T  | 33.47       | 0.92 | 2.07E-04 | 34.17       | 0.94 | 1.58E-03 | 32.87       | 0.95 | 0.0795   | 33.50       | 0.88 | 0.0144   | 33.41       | 0.96 | 0.0667   | 38.45       | 0.93 | 2.02E-03 | <b>0.94</b> | <b>1.38E-10</b>  | 0.477            |
| chr11 | 118870448 | rs7117261               | .                   | regulatory region  | T  | C  | 20.03       | 0.92 | 2.55E-03 | 20.08       | 0.90 | 8.01E-06 | 17.76       | 0.95 | 0.135    | 21.28       | 0.79 | 3.24E-04 | 19.34       | 0.94 | 0.0159   | 16.61       | 0.91 | 2.53E-03 | <b>0.92</b> | <b>7.63E-13</b>  | 0.17             |
| chr12 | 111446804 | rs3184504               | <b>SH2B3</b>        | missense           | T  | C  | 46.74       | 1.08 | 5.65E-04 | 50.60       | 1.06 | 2.71E-03 | 37.86       | 1.07 | 0.0198   | 45.38       | 1.19 | 6.10E-04 | 46.35       | 1.08 | 4.67E-05 | 40.83       | 1.12 | 1.95E-07 | <b>1.08</b> | <b>1.10E-17</b>  | 0.136            |
| chr13 | 39771329  | rs7320598               | <b>COG6</b>         | intron             | T  | C  | 33.63       | 0.93 | 1.27E-03 | 34.29       | 0.91 | 2.30E-07 | 31.89       | 0.95 | 0.106    | 34.12       | 0.89 | 3.27E-02 | 34.46       | 0.94 | 3.30E-03 | 35.69       | 0.93 | 1.80E-03 | <b>0.93</b> | <b>1.55E-14</b>  | 0.599            |
| chr14 | 92651884  | rs117068593*            | <b>RIN3</b>         | missense           | T  | C  | 15.65       | 0.95 | 0.117    | 17.23       | 0.91 | 6.94E-05 | 15.57       | 0.84 | 1.98E-05 | 16.41       | 1.01 | 0.868    | 18.41       | 0.94 | 7.26E-03 | 14.22       | 0.95 | 0.141    | <b>0.93</b> | <b>1.93E-09</b>  | 0.0795           |
| chr15 | 69746861  | rs2117234*              | .                   | intergenic         | T  | C  | 46.69       | 1.12 | 4.99E-07 | 46.22       | 1.07 | 2.89E-04 | 49.83       | 1.09 | 2.83E-03 | 44.97       | 1.10 | 0.0574   | 47.08       | 1.05 | 5.26E-03 | 47.64       | 1.07 | 3.88E-03 | <b>1.08</b> | <b>2.71E-15</b>  | 0.468            |
| chr16 | 85977427  | rs13333054              | <b>IRF8</b>         | intergenic         | T  | C  | 23.08       | 1.07 | 0.00561  | 22.49       | 1.10 | 1.58E-05 | 23.15       | 1.02 | 0.459    | 23.78       | 1.09 | 0.161    | 22.70       | 1.07 | 1.19E-03 | 19.25       | 1.07 | 0.0194   | <b>1.07</b> | <b>1.12E-10</b>  | 0.671            |
| chr19 | 10352442  | rs34536443              | <b>TYK2</b>         | missense           | C  | G  | 3.64        | 0.71 | 2.94E-08 | 4.18        | 0.77 | 5.30E-08 | 4.38        | 0.79 | 8.11E-04 | 4.51        | 0.69 | 4.27E-03 | 4.39        | 0.78 | 9.52E-07 | 3.06        | 0.71 | 3.84E-07 | <b>0.75</b> | <b>2.54E-29</b>  | 0.676            |
| chr19 | 10359299  | rs12720356*             | <b>TYK2</b>         | missense           | C  | A  | 8.60        | 0.92 | 0.0215   | 7.84        | 0.92 | 0.014    | 5.98        | 0.93 | 0.249    | 9.06        | 0.82 | 0.0296   | 9.31        | 0.89 | 4.52E-04 | 8.25        | 0.87 | 4.78E-04 | <b>0.90</b> | <b>4.31E-10</b>  | 0.712            |

<sup>a</sup>We performed a meta-analysis using logistic regression assuming a multiplicative model, reporting odds ratios (OR) and two-sided *P*-values (Methods and Gudbjartsson et al, 2015). Variants were split into five classes based on their genome annotation, and significance threshold based on the number of variants in each class, thereby adjusting for all 60 million variants tested (Methods). The primary signal at each genomic locus was defined as the sequence variant with the lowest Bonferroni adjusted *P*-value using the adjusted significance thresholds. Conditional analysis was performed to identify lead signals and possible secondary signals within 500 kb from index variants (excluding the HLA locus). This applied to the following marker pair: chr19:10352442 and chr19:10359299.

\*Sequence variants that are not correlated ( $R^2 < 0.8$ ) with, and significant after adjustment for, previously reported sequence variants for RA (Supplementary Table 1).

Bold indicates sequence variants that are supported by functional variant annotation, where the variant or correlated variant,  $R^2 > 0.8$ ) are coding, associate with mRNA expression and/or plasma protein levels (summarized in Figure 2).

Abbreviations: EA: effect allele; OA: other allele; OR: odds ratio; *P*<sub>het</sub>: a *P*-value for test of heterogeneity between the results in cohorts included in the meta-analysis.
