# Supplementary material for: Multiomics analysis of rheumatoid arthritis yields sequence variants that have large effects on risk of the seropositive subset
Source: PubMed Central journal article supplement — Ann Rheum Dis. 2022 Apr 25;81(8):1085–95. doi: 10.1136/annrheumdis-2021-221754 (PMC9279832; doi:10.1136/annrheumdis-2021-221754), 2022-04-25
Supplement: annrheumdis-2021-221754supp013.pdf [file annrheumdis-2021-221754supp013.pdf]

**Supplementary Table 6. Effect of sequence variants associated with RA overall or its seropositive/seronegative subsets on mRNA expression (cis-eQTL) in various tissues.**

| Lead variant     | eQTL variant   | R <sup>2</sup> | Gene    | P         | effect (SD) | tissue                                | EA | effect unit | hgnc  | geneid    | Source (Suppl. T.7)   |
|------------------|----------------|----------------|---------|-----------|-------------|---------------------------------------|----|-------------|-------|-----------|-----------------------|
| chr1:2800059     | chr1:2569783   | 0.84           | PRXL2B  | 1.26E-10  | -0.14       | Cells_Cultured_fibroblasts            | T  | beta        | 28390 | 127281    | GTEEx v8              |
| chr1:2800059     | chr1:2575976   | 0.90           | TTC34   | 3.32E-18  | 0.26        | Artery_Tibial                         | T  | beta        | 34297 | 100287898 | GTEEx v8              |
| chr1:2800059     | chr1:2591773   | 0.95           | TTC34   | 1.82E-13  | 0.42        | Brain_Cerebellum                      | C  | beta        | 34297 | 100287898 | GTEEx v8              |
| chr1:2800059     | chr1:2593018   | 0.89           | MMEL1   | 3.74E-24  | -0.71       | Brain_Nucleus_accumbens_basal_ganglia | C  | beta        | 14668 | 79258     | GTEEx v8              |
| chr1:2800059     | chr1:2593018   | 0.89           | PRXL2B  | 2.10E-16  | -0.27       | Lung                                  | C  | beta        | 28390 | 127281    | GTEEx v8              |
| chr1:2800059     | chr1:2593476   | 0.95           | MMEL1   | 1.88E-243 | -33.32      | blood                                 | T  | zscore      | 14668 | 79258     | Vosa et al.           |
| chr1:2800059     | chr1:2594221   | 0.95           | MMEL1   | <E-310    | -0.69       | blood                                 | A  | beta        | 14668 | 79258     | deCODE genetics       |
| chr1:2800059     | chr1:2594221   | 0.95           | MMEL1   | 1.32E-27  | -0.52       | Whole_Blood                           | A  | beta        | 14668 | 79258     | GTEEx v8              |
| chr1:2800059     | chr1:2596694   | 0.96           | MMEL1   | 3.50E-27  | 0.78        | Spleen                                | C  | beta        | 14668 | 79258     | GTEEx v8              |
| chr1:2800059     | chr1:2601185   | 0.96           | MMEL1   | 8.15E-69  | 0.75        | Lung                                  | T  | beta        | 14668 | 79258     | GTEEx v8              |
| chr1:2800059     | chr1:2602113   | 0.96           | MMEL1   | 2.49E-54  | na          | MO                                    | na | na          | 14668 | 79258     | Zeller et al. (2010)  |
| chr1:2800059     | chr1:2606399   | 0.99           | TTC34   | 1.39E-15  | 0.20        | Nerve_Tibial                          | T  | beta        | 34297 | 100287898 | GTEEx v8              |
| chr1:2800059     | chr1:2607567   | 0.92           | MMEL1   | 1.29E-26  | -0.46       | Artery_Tibial                         | C  | beta        | 14668 | 79258     | GTEEx v8              |
| chr1:2800059     | chr1:2607961   | 0.92           | MMEL1   | 2.17E-17  | -0.71       | Liver                                 | C  | beta        | 14668 | 79258     | GTEEx v8              |
| chr1:2800059     | chr1:2608357   | 0.98           | TTC34   | 2.45E-12  | 0.26        | Esophagus_Muscularis                  | T  | beta        | 34297 | 100287898 | GTEEx v8              |
| chr1:2800059     | chr1:2608357   | 0.98           | TTC34   | 5.58E-15  | 0.33        | Esophagus_Gastroesophageal_Junction   | T  | beta        | 34297 | 100287898 | GTEEx v8              |
| chr1:2800059     | chr1:2623124   | 0.99           | TTC34   | 2.21E-13  | 0.35        | Pancreas                              | G  | beta        | 34297 | 100287898 | GTEEx v8              |
| chr1:2800059     | chr1:2636061   | 0.99           | MMEL1   | 1.86E-16  | 0.42        | Small_Intestine_Terminal_Ileum        | G  | beta        | 14668 | 79258     | GTEEx v8              |
| chr1:2800059     | chr1:2636061   | 0.99           | TTC34   | 6.90E-11  | -0.47       | Cells_EBV-transformed_lymphocytes     | G  | beta        | 34297 | 100287898 | GTEEx v8              |
| chr1:2800059     | chr1:2636061   | 0.99           | TTC34   | 7.24E-15  | -0.27       | Whole_Blood                           | G  | beta        | 34297 | 100287898 | GTEEx v8              |
| chr1:2800059     | chr1:2642639   | 0.97           | TTC34   | 6.72E-16  | -0.55       | Pituitary                             | C  | beta        | 34297 | 100287898 | GTEEx v8              |
| chr1:2800059     | chr1:2642639   | 0.97           | TTC34   | 7.64E-12  | -0.26       | Artery_Aorta                          | C  | beta        | 34297 | 100287898 | GTEEx v8              |
| chr1:2800059     | chr1:2791865   | 0.99           | TTC34   | 2.54E-14  | 0.30        | Heart_Atrial_Appendage                | A  | beta        | 34297 | 100287898 | GTEEx v8              |
| chr1:2800059     | chr1:2791865   | 0.99           | TTC34   | 2.89E-17  | 0.20        | Thyroid                               | A  | beta        | 34297 | 100287898 | GTEEx v8              |
| chr1:2800059     | chr1:2803608   | 1.00           | MMEL1   | 2.88E-10  | -0.25       | Colon_Transverse                      | G  | beta        | 14668 | 79258     | GTEEx v8              |
| chr1:2800059     | chr1:2804584   | 1.00           | MMEL1   | 8.42E-35  | -0.47       | Thyroid                               | A  | beta        | 14668 | 79258     | GTEEx v8              |
| chr1:2800059     | chr1:2804584   | 1.00           | TTC34   | 6.16E-18  | 0.28        | Skin_Sun_Exposed_Lower_leg            | A  | beta        | 34297 | 100287898 | GTEEx v8              |
| chr2:60881694    | chr2:60856371  | 0.93           | REL     | 1.12E-15  | -0.02       | whole_blood                           | T  | fx          | 9954  | 5966      | Yao et al. (2017)     |
| chr2:60881694    | chr2:60881694  | 1.00           | REL     | 1.27E-09  | -0.38       | STARNET_Blood                         | G  | beta        | 9954  | 5966      | Hauberg et al. (2017) |
| chr2:60881694    | chr2:60937196  | 0.96           | PUS10   | 1.23E-14  | -0.03       | whole_blood                           | G  | fx          | 26505 | 150962    | Yao et al. (2017)     |
| chr2:111119036   | chr2:111119036 | 1.00           | BCL2L11 | 1.77E-141 | 0.58        | blood                                 | C  | beta        | 994   | 10018     | deCODE genetics       |
| chr2:191094763   | chr2:191105153 | 0.98           | GLS     | 5.88E-09  | -0.01       | whole_blood                           | C  | fx          | 4331  | 2744      | Yao et al. (2017)     |
| chr2:203874196*  | chr2:203829540 | 0.92           | CTLA4   | 2.30E-70  | 17.73       | blood                                 | A  | zscore      | 2505  | 1493      | Vosa et al.           |
| chr2:203874196*  | chr2:203878211 | 0.89           | CTLA4   | 2.11E-15  | 0.42        | Testis                                | T  | beta        | 2505  | 1493      | GTEEx v8              |
| chr2:203880280** | chr2:203829540 | 0.80           | CTLA4   | 2.30E-70  | 17.73       | blood                                 | A  | zscore      | 2505  | 1493      | Vosa et al.           |
| chr2:203880280** | chr2:203878211 | 0.98           | CTLA4   | 2.11E-15  | 0.42        | Testis                                | T  | beta        | 2505  | 1493      | GTEEx v8              |
| chr5:56148856    | chr5:56148856  | 1.00           | ANKRD55 | <E-310    | -0.81       | blood                                 | A  | beta        | 25681 | 79722     | deCODE genetics       |
| chr5:56148856    | chr5:56148856  | 1.00           | ANKRD55 | 3.27E-310 | -73.83      | blood                                 | A  | zscore      | 25681 | 79722     | Vosa et al.           |
| chr5:56148856    | chr5:56148856  | 1.00           | ANKRD55 | 4.62E-43  | 0.84        | white_blood_cells                     | G  | beta        | 25681 | 79722     | Pala et al. (2017)    |
| chr5:56148856    | chr5:56148856  | 1.00           | IL6ST   | 1.90E-44  | -0.18       | blood                                 | A  | beta        | 6021  | 3572      | deCODE genetics       |
| chr5:56148856    | chr5:56148856  | 1.00           | IL6ST   | 2.00E-36  | -12.60      | blood                                 | A  | zscore      | 6021  | 3572      | Vosa et al.           |

| Lead variant     | eQTL variant   | R <sup>2</sup> | Gene    | P         | effect (SD) | tissue                              | EA | effect unit | hgnc  | geneid | Source (Suppl. T.7)     |
|------------------|----------------|----------------|---------|-----------|-------------|-------------------------------------|----|-------------|-------|--------|-------------------------|
| chr6:167127770   | chr6:167119243 | 0.97           | CCR6    | 4.92E-11  | 0.34        | adipose                             | A  | beta        | 1607  | 1235   | deCODE genetics         |
| chr6:167127770   | chr6:167119243 | 0.97           | CCR6    | 4.98E-148 | 25.91       | blood                               | A  | zscore      | 1607  | 1235   | Vosa et al.             |
| chr6:167127770   | chr6:167119305 | 0.97           | CCR6    | 6.04E-15  | -0.04       | whole_blood                         | G  | fx          | 1607  | 1235   | Yao et al. (2017)       |
| chr6:167127770   | chr6:167125409 | 0.97           | CCR6    | 1.45E-205 | 0.38        | blood                               | T  | beta        | 1607  | 1235   | deCODE genetics         |
| chr7:128938247   | chr7:128932712 | 0.86           | IRF5    | 4.13E-43  | 0.42        | Esophagus_Mucosa                    | A  | beta        | 6120  | 3663   | GTEEx v8                |
| chr7:128938247   | chr7:128932712 | 0.86           | IRF5    | 5.06E-18  | 0.37        | Adrenal_Gland                       | A  | beta        | 6120  | 3663   | GTEEx v8                |
| chr7:128938247   | chr7:128932712 | 0.86           | IRF5    | 9.68E-11  | 0.22        | Heart_Left_Ventricle                | A  | beta        | 6120  | 3663   | GTEEx v8                |
| chr7:128938247   | chr7:128935498 | 0.81           | IRF5    | 1.11E-86  | 0.40        | Whole_Blood                         | G  | beta        | 6120  | 3663   | GTEEx v8                |
| chr7:128938247   | chr7:128935498 | 0.81           | IRF5    | 1.88E-30  | 0.34        | Skin_Not_Sun_Exposed_Suprapubic     | G  | beta        | 6120  | 3663   | GTEEx v8                |
| chr7:128938247   | chr7:128935498 | 0.81           | IRF5    | 2.74E-27  | 0.44        | Stomach                             | G  | beta        | 6120  | 3663   | GTEEx v8                |
| chr7:128938247   | chr7:128935498 | 0.81           | IRF5    | 2.81E-38  | 0.32        | Skin_Sun_Exposed_Lower_leg          | G  | beta        | 6120  | 3663   | GTEEx v8                |
| chr7:128938247   | chr7:128935498 | 0.81           | IRF5    | 3.58E-18  | 0.32        | Colon_Sigmoid                       | G  | beta        | 6120  | 3663   | GTEEx v8                |
| chr7:128938247   | chr7:128938247 | 1.00           | IRF5    | 2.36E-26  | 0.64        | white_blood_cells                   | T  | beta        | 6120  | 3663   | Pala et al. (2017)      |
| chr8:11480078    | chr8:11486464  | 0.98           | BLK     | 2.08E-23  | na          | MO                                  | na | na          | 1057  | 640    | Zeller et al. (2010)    |
| chr8:11480078    | chr8:11493510  | 0.93           | FAM167A | 3.27E-310 | 86.83       | blood                               | A  | zscore      | 15549 | 83648  | Vosa et al.             |
| chr8:11480078    | chr8:11495032  | 0.91           | BLK     | 1.33E-40  | 0.86        | white_blood_cells                   | T  | beta        | 1057  | 640    | Pala et al. (2017)      |
| chr8:11480078    | chr8:11482373  | 1.00           | BLK     | 4.84E-16  | 0.60        | STARNET_Blood                       | T  | beta        | 1057  | 640    | Hauberg et al. (2017)   |
| chr8:11480078    | chr8:11493510  | 0.93           | BLK     | 3.55E-27  | 0.44        | LCL                                 | G  | beta        | 1057  | 640    | Grundberg et al. (2016) |
| chr8:11480078    | chr8:11482373  | 1.00           | FAM167A | 5.39E-27  | 0.30        | Cells_Cultured_fibroblasts          | C  | beta        | 15549 | 83648  | GTEEx v8                |
| chr8:11480078    | chr8:11482373  | 1.00           | BLK     | 9.41E-54  | 0.04        | whole_blood                         | T  | fx          | 1057  | 640    | Yao et al. (2017)       |
| chr8:11480078    | chr8:11480078  | 1.00           | BLK     | 5.14E-28  | -0.24       | Whole_Blood                         | C  | beta        | 1057  | 640    | GTEEx v8                |
| chr8:11480078    | chr8:11491677  | 0.99           | FAM167A | 6.15E-44  | -0.42       | LCL                                 | G  | beta        | 15549 | 83648  | Grundberg et al. (2016) |
| chr8:11480078    | chr8:11493510  | 0.93           | FAM167A | 1.12E-89  | -1.15       | STARNET_Blood                       | G  | beta        | 15549 | 83648  | Hauberg et al. (2017)   |
| chr8:11480078    | chr8:11486464  | 0.98           | FAM167A | 2.37E-74  | -1.24       | white_blood_cells                   | C  | beta        | 15549 | 83648  | Pala et al. (2017)      |
| chr8:11480078    | chr8:11493510  | 0.93           | BLK     | 3.27E-310 | -52.05      | blood                               | A  | zscore      | 1057  | 640    | Vosa et al.             |
| chr9:120873843*  | chr9:120877952 | 0.95           | TRAF1   | 4.42E-23  | na          | MO                                  | na | na          | 12031 | 7185   | Zeller et al. (2010)    |
| chr9:120873843*  | chr9:120881577 | 0.95           | PSMD5   | 3.19E-12  | 0.02        | whole_blood                         | T  | fx          | 9563  | 5711   | Yao et al. (2017)       |
| chr9:120873843*  | chr9:120896705 | 0.94           | PHF19   | 7.85E-11  | 0.31        | Esophagus_Gastroesophageal_Junction | A  | beta        | 24566 | 26147  | GTEEx v8                |
| chr9:120873843*  | chr9:120902741 | 0.95           | TRAF1   | 6.85E-15  | -0.30       | dendritic_flu                       | na | beta        | 12031 | 7185   | Lee et al. (2014)       |
| chr9:120873843*  | chr9:120906929 | 0.95           | PHF19   | 6.33E-201 | -30.24      | blood                               | C  | zscore      | 24566 | 26147  | Vosa et al.             |
| chr9:120873843*  | chr9:120914118 | 0.93           | PHF19   | 1.34E-15  | 0.29        | Esophagus_Muscularis                | C  | beta        | 24566 | 26147  | GTEEx v8                |
| chr9:120873843*  | chr9:120928959 | 0.91           | PHF19   | 1.83E-10  | -0.40       | STARNET_Blood                       | T  | beta        | 24566 | 26147  | Hauberg et al. (2017)   |
| chr9:120873843*  | chr9:120928959 | 0.91           | TRAF1   | 2.62E-170 | 0.35        | blood                               | T  | beta        | 12031 | 7185   | deCODE genetics         |
| chr9:120873843*  | chr9:120928959 | 0.91           | TRAF1   | 4.40E-14  | -0.24       | Artery_Tibial                       | G  | beta        | 12031 | 7185   | GTEEx v8                |
| chr9:120873843*  | chr9:120928959 | 0.91           | TRAF1   | 5.10E-32  | -0.36       | Skin_Not_Sun_Exposed_Suprapubic     | G  | beta        | 12031 | 7185   | GTEEx v8                |
| chr9:120873843*  | chr9:120928959 | 0.91           | TRAF1   | 5.54E-21  | -0.24       | Skin_Sun_Exposed_Lower_leg          | G  | beta        | 12031 | 7185   | GTEEx v8                |
| chr9:120873843*  | chr9:120928959 | 0.91           | TRAF1   | 5.90E-12  | -0.14       | Whole_Blood                         | G  | beta        | 12031 | 7185   | GTEEx v8                |
| chr9:120873843*  | chr9:120930801 | 0.95           | TRAF1   | 6.22E-08  | 0.34        | STARNET_Blood                       | C  | beta        | 12031 | 7185   | Hauberg et al. (2017)   |
| chr9:120873843*  | chr9:120930801 | 0.92           | TRAF1   | 6.22E-08  | 0.34        | STARNET_Blood                       | C  | beta        | 12031 | 7185   | Hauberg et al. (2017)   |
| chr9:120933192** | chr9:120929191 | 1.00           | TRAF1   | 1.40E-25  | 0.72        | Brain_Cerebellum                    | G  | beta        | 12031 | 7185   | GTEEx v8                |
| chr9:120933192** | chr9:120929191 | 1.00           | TRAF1   | 1.24E-16  | 0.68        | Brain_Spinal_cord_cervical_c-1      | G  | beta        | 12031 | 7185   | GTEEx v8                |
| chr9:120933192** | chr9:120906048 | 1.00           | TRAF1   | 1.26E-21  | 0.66        | Brain_Cerebellar_Hemisphere         | C  | beta        | 12031 | 7185   | GTEEx v8                |
| chr9:120933192** | chr9:120878222 | 1.00           | TRAF1   | 9.87E-15  | 0.52        | Brain_Amygdala                      | C  | beta        | 12031 | 7185   | GTEEx v8                |
| chr9:120933192** | chr9:120920828 | 1.00           | TRAF1   | 1.18E-24  | 0.48        | Brain_Putamen_basal_ganglia         | T  | beta        | 12031 | 7185   | GTEEx v8                |

| Lead variant     | eQTL variant   | R <sup>2</sup> | Gene   | P        | effect (SD) | tissue                                | EA | effect unit | hgnc  | geneid    | Source (Suppl. T.7)     |
|------------------|----------------|----------------|--------|----------|-------------|---------------------------------------|----|-------------|-------|-----------|-------------------------|
| chr9:120933192** | chr9:120920828 | 1.00           | TRAF1  | 2.35E-13 | 0.47        | Brain_Substantia_nigra                | T  | beta        | 12031 | 7185      | GTEEx v8                |
| chr9:120933192** | chr9:120928863 | 1.00           | TRAF1  | 1.78E-18 | 0.47        | Brain_Hypothalamus                    | C  | beta        | 12031 | 7185      | GTEEx v8                |
| chr9:120933192** | chr9:120924933 | 1.00           | TRAF1  | 2.19E-21 | 0.46        | Brain_Hippocampus                     | A  | beta        | 12031 | 7185      | GTEEx v8                |
| chr9:120933192** | chr9:120929191 | 1.00           | TRAF1  | 2.30E-34 | 0.46        | Testis                                | G  | beta        | 12031 | 7185      | GTEEx v8                |
| chr9:120933192** | chr9:120929191 | 1.00           | TRAF1  | 1.34E-10 | 0.44        | Ovary                                 | G  | beta        | 12031 | 7185      | GTEEx v8                |
| chr9:120933192** | chr9:120909559 | 1.00           | TRAF1  | 4.55E-24 | 0.44        | Brain_Caudate_basal_ganglia           | C  | beta        | 12031 | 7185      | GTEEx v8                |
| chr9:120933192** | chr9:120929191 | 1.00           | TRAF1  | 3.31E-23 | 0.42        | Brain_Nucleus_accumbens_basal_ganglia | G  | beta        | 12031 | 7185      | GTEEx v8                |
| chr9:120933192** | chr9:120915851 | 0.98           | TRAF1  | 2.14E-15 | 0.37        | Brain_Cortex                          | A  | beta        | 12031 | 7185      | GTEEx v8                |
| chr9:120933192** | chr9:120946008 | 0.91           | TRAF1  | 4.34E-12 | 0.30        | Brain_Frontal_Cortex_BA9              | C  | beta        | 12031 | 7185      | GTEEx v8                |
| chr9:120933192** | chr9:120930590 | 1.00           | TRAF1  | 2.40E-34 | 0.27        | Muscle_Skeletal                       | T  | beta        | 12031 | 7185      | GTEEx v8                |
| chr9:120933192** | chr9:120930590 | 1.00           | TRAF1  | 2.59E-10 | 0.23        | Heart_Left_Ventricle                  | T  | beta        | 12031 | 7185      | GTEEx v8                |
| chr9:120933192** | chr9:120899028 | 1.00           | TRAF1  | 5.93E-23 | -0.16       | CMC_Brain_DLPFC                       | A  | beta        | 12031 | 7185      | Hauberg et al. (2017)   |
| chr9:120933192** | chr9:120904499 | 0.90           | TRAF1  | 8.92E-11 | -0.24       | Artery_Aorta                          | C  | beta        | 12031 | 7185      | GTEEx v8                |
| chr9:120933192** | chr9:120888049 | 0.99           | TRAF1  | 1.64E-39 | -0.73       | STARNET_Muscle_skeletal               | T  | beta        | 12031 | 7185      | Hauberg et al. (2017)   |
| chr10:31122426   | chr10:31122426 | 1.00           | ZEB1   | 3.71E-15 | -0.15       | Cells_Cultured_fibroblasts            | T  | beta        | 11642 | 6935      | GTEEx v8                |
| chr13:28029870   | chr13:28029870 | 1.00           | FLT3   | 1.30E-10 | 0.82        | Lung                                  | C  | beta        | 3765  | 2322      | GTEEx v8                |
| chr17:39908216   | chr17:39756124 | 0.83           | GSDMA  | <E-310   | 0.47        | lung                                  | T  | beta        | 13311 | 284110    | Hao et al. (2012)       |
| chr17:39908216   | chr17:39869782 | 0.94           | ZBP2   | 5.46E-24 | -0.22       | Testis                                | A  | beta        | 20678 | 124626    | GTEEx v8                |
| chr17:39908216   | chr17:39900944 | 0.98           | GSDMB  | 1.70E-19 | -0.20       | Colon_Transverse                      | A  | beta        | 23690 | 55876     | GTEEx v8                |
| chr17:39908216   | chr17:39909987 | 0.80           | ORMDL3 | 6.66E-24 | -0.25       | Lung                                  | C  | beta        | 16038 | 94103     | GTEEx v8                |
| chr17:39908216   | chr17:39910014 | 0.80           | ORMDL3 | 1.74E-16 | 0.50        | STARNET_Artery_aortic_root_(AS)       | G  | beta        | 16038 | 94103     | Hauberg et al. (2017)   |
| chr17:39908216   | chr17:39910119 | 0.80           | GSDMB  | 3.39E-83 | 1.11        | white_blood_cells                     | T  | beta        | 23690 | 55876     | Pala et al. (2017)      |
| chr17:39908216   | chr17:39910119 | 0.80           | ORMDL3 | 6.08E-92 | 1.16        | white_blood_cells                     | T  | beta        | 16038 | 94103     | Pala et al. (2017)      |
| chr17:39908216   | chr17:39916474 | 0.92           | GSDMB  | 2.02E-16 | 0.31        | Small_Intestine_Terminal_ileum        | T  | beta        | 23690 | 55876     | GTEEx v8                |
| chr17:39908216   | chr17:39916474 | 0.92           | ORMDL3 | 5.95E-11 | -0.13       | Adipose_Subcutaneous                  | T  | beta        | 16038 | 94103     | GTEEx v8                |
| chr19:10359299   | chr19:10310306 | 0.91           | FDX2   | 6.53E-14 | -0.31       | Thyroid                               | C  | beta        | 30546 | 112812    | GTEEx v8                |
| chr19:10359299   | chr19:10310306 | 0.91           | ZGLP1  | <E-310   | 0.97        | blood                                 | C  | beta        | 37245 | 100125288 | deCODE genetics         |
| chr19:10359299   | chr19:10310306 | 0.91           | ZGLP1  | 1.53E-10 | -0.27       | Brain_Nucleus_accumbens_basal_ganglia | C  | beta        | 37245 | 100125288 | GTEEx v8                |
| chr19:10359299   | chr19:10310306 | 0.91           | ZGLP1  | 1.55E-11 | -0.24       | Nerve_Tibial                          | C  | beta        | 37245 | 100125288 | GTEEx v8                |
| chr19:10359299   | chr19:10310306 | 0.91           | ZGLP1  | 1.65E-21 | -0.32       | Thyroid                               | C  | beta        | 37245 | 100125288 | GTEEx v8                |
| chr19:10359299   | chr19:10310306 | 0.91           | ZGLP1  | 3.69E-11 | -0.45       | Brain_Cerebellum                      | C  | beta        | 37245 | 100125288 | GTEEx v8                |
| chr19:10359299   | chr19:10310306 | 0.91           | ZGLP1  | 5.73E-12 | -0.35       | Testis                                | C  | beta        | 37245 | 100125288 | GTEEx v8                |
| chr19:10359299   | chr19:10359300 | 1.00           | FDX2   | 4.25E-08 | -0.13       | LCL                                   | C  | beta        | 30546 | 112812    | Grundberg et al. (2016) |

Different lead signals in RA overall (\*) and seropositive RA (\*\*) at the same locus pointing to same candidate causal genes.

\*\*\*Sequence variants associated both with RA overall and its seropositive and seronegative subsets.
