# Supplementary material for: Multiomics analysis of rheumatoid arthritis yields sequence variants that have large effects on risk of the seropositive subset
Source: PubMed Central journal article supplement — Ann Rheum Dis. 2022 Apr 25;81(8):1085–95. doi: 10.1136/annrheumdis-2021-221754 (PMC9279832; doi:10.1136/annrheumdis-2021-221754), 2022-04-25
Supplement: annrheumdis-2021-221754supp015.pdf [file annrheumdis-2021-221754supp015.pdf]

Supplementary Table 8. Results from conditional analysis where more than one independent signal is detected at the same locus.

| RA overall             |           | Sweden      |    |    |        |         |        |         |        |         |        |         |        | Denmark |        | Iceland |        | Norway  |                               | UK    |        | Finland |            | Adjusted |         | Combined results |  | Unadjusted* |  |
|------------------------|-----------|-------------|----|----|--------|---------|--------|---------|--------|---------|--------|---------|--------|---------|--------|---------|--------|---------|-------------------------------|-------|--------|---------|------------|----------|---------|------------------|--|-------------|--|
| Chr                    | Position  | rsID        | EA | OA | Adj.OR | Adj.P   | Adj.OR                        | Adj.P | Adj.OR | Adj.P   | Covariates | Unadj.OR | Unadj.P |                  |  |             |  |
| chr2                   | 191073180 | rs140675301 | A  | T  | 1.29   | 0.26    | 1.80   | 5.3E-03 | 0.82   | 0.57    | 1.81   | 0.29    | 1.24   | 0.26    | 2.92   | 1.4E-04 | 1.49   | 8.8E-05 | chr2:191094763                |       |        |         | 1.63       | 3.85E-06 |         |                  |  |             |  |
| chr2                   | 191094763 | rs4853458   | A  | G  | 1.10   | 2.4E-04 | 1.06   | 5.1E-03 | 1.12   | 6.1E-04 | 1.04   | 0.53    | 1.12   | 9.4E-07 | 1.13   | 3.0E-06 | 1.10   | 7.1E-18 | chr2:191073180                |       |        |         | 1.10       | 2.72E-19 |         |                  |  |             |  |
| chr16                  | 85982485  | rs9939427   | A  | G  | 1.08   | 3.3E-03 | 1.09   | 1.0E-04 | 1.04   | 0.24    | 1.10   | 0.10    | 1.07   | 2.0E-03 | 1.07   | 0.02    | 1.07   | 1.5E-10 | chr16:88981246                |       |        |         | 1.07       | 1.7E-10  |         |                  |  |             |  |
| chr16                  | 88981246  | rs62045818  | C  | T  | 0.93   | 9.9E-04 | 0.97   | 0.10    | 0.96   | 0.13    | 0.94   | 0.25    | 0.98   | 0.31    | 1.53   | 0.08    | 0.96   | 1.9E-04 | chr16:85982485                |       |        |         | 0.96       | 3.1E-05  |         |                  |  |             |  |
| chr19                  | 10352442  | rs34536443  | C  | G  | 0.70   | 1.1E-08 | 0.76   | 1.2E-08 | 0.77   | 3.3E-04 | 0.67   | 2.3E-03 | 0.77   | 2.2E-07 | 0.70   | 1.4E-07 | 0.74   | 4.4E-32 | chr19:10354167,chr19:10359299 |       |        |         | 0.75       | 2.54E-29 |         |                  |  |             |  |
| chr19                  | 10354167  | rs35018800  | A  | G  | 0.74   | 0.01    | 0.74   | 1.4E-03 | 0.67   | 2.9E-03 | 0.61   | 0.05    | 0.87   | 0.19    | 0.76   | 0.04    | 0.75   | 1.5E-08 | chr19:10352442,chr19:10359299 |       |        |         | 0.77       | 1.39E-07 |         |                  |  |             |  |
| chr19                  | 10359299  | rs12720356  | C  | A  | 0.91   | 8.6E-03 | 0.91   | 3.7E-03 | 0.92   | 0.15    | 0.80   | 0.02    | 0.88   | 1.0E-04 | 0.86   | 1.9E-04 | 0.89   | 2.0E-12 | chr19:10352442,chr19:10354167 |       |        |         | 0.90       | 4.31E-10 |         |                  |  |             |  |
| <b>Seropositive RA</b> |           |             |    |    |        |         |        |         |        |         |        |         |        |         |        |         |        |         |                               |       |        |         |            |          |         |                  |  |             |  |
| chr2                   | 191073180 | rs140675301 | A  | T  | 1.57   | 0.05    | 1.84   | 0.02    | 1.15   | 0.75    | 2.12   | 0.25    | 2.87   | 2.0E-03 | 4.33   | 2.4E-05 | 2.03   | 6.1E-08 | chr2:191094763                |       |        |         | 2.27       | 2.05E-09 |         |                  |  |             |  |
| chr2                   | 191094763 | rs4853458   | A  | G  | 1.09   | 1.8E-03 | 1.07   | 6.9E-03 | 1.17   | 5.8E-04 | 1.05   | 0.54    | 1.14   | 0.02    | 1.14   | 9.3E-06 | 1.11   | 2.0E-12 | chr2:191073180                |       |        |         | 1.11       | 5.19E-14 |         |                  |  |             |  |
| chr16                  | 85982485  | rs9939427   | A  | G  | 1.09   | 1.7E-03 | 1.13   | 3.0E-06 | 1.07   | 0.16    | 1.06   | 0.39    | 1.07   | 0.26    | 1.11   | 1.6E-03 | 1.10   | 4.1E-11 | chr16:88981246                |       |        |         | 1.10       | 5.2E-11  |         |                  |  |             |  |
| chr16                  | 88981246  | rs62045818  | C  | T  | 0.91   | 1.8E-04 | 0.94   | 0.01    | 0.90   | 6.2E-03 | 0.85   | 0.01    | 0.87   | 5.2E-03 | 0.96   | 0.12    | 0.93   | 8.2E-10 | chr16:85982485                |       |        |         | 0.93       | 8.9E-10  |         |                  |  |             |  |
| chr19                  | 10352442  | rs34536443  | C  | G  | 0.66   | 2.0E-09 | 0.73   | 7.2E-08 | 0.68   | 2.2E-04 | 0.70   | 0.02    | 0.52   | 3.3E-06 | 0.67   | 1.3E-07 | 0.68   | 1.0E-29 | chr19:10354167,chr19:10359299 |       |        |         | 0.69       | 2.68E-27 |         |                  |  |             |  |
| chr19                  | 10354167  | rs35018800  | A  | G  | 0.62   | 5.6E-04 | 0.66   | 3.2E-04 | 0.43   | 6.0E-05 | 0.67   | 0.18    | 0.44   | 0.01    | 0.68   | 0.01    | 0.61   | 1.3E-12 | chr19:10352442,chr19:10359299 |       |        |         | 0.63       | 1.43E-11 |         |                  |  |             |  |
| chr19                  | 10359299  | rs12720356  | C  | A  | 0.89   | 3.4E-03 | 0.88   | 2.2E-03 | 0.98   | 0.78    | 0.74   | 7.0E-03 | 0.77   | 2.3E-03 | 0.82   | 1.7E-05 | 0.86   | 1.8E-11 | chr19:10352442,chr19:10354167 |       |        |         | 0.87       | 2.27E-09 |         |                  |  |             |  |
| <b>Seronegative RA</b> |           |             |    |    |        |         |        |         |        |         |        |         |        |         |        |         |        |         |                               |       |        |         |            |          |         |                  |  |             |  |
| chr2                   | 191073180 | rs140675301 | A  | T  | 0.39   | 0.07    | 1.34   | 0.45    | 0.65   | 0.53    | 1.32   | 0.77    | 1.61   | 0.24    | 1.97   | 0.14    | 1.18   | 0.42    | chr2:191094763                |       |        |         | 1.23       | 0.34     |         |                  |  |             |  |
| chr2                   | 191094763 | rs4853458   | A  | G  | 1.12   | 7.8E-03 | 1.12   | 1.1E-03 | 1.05   | 0.43    | 1.06   | 0.46    | 0.99   | 0.80    | 1.17   | 6.2E-04 | 1.10   | 1.6E-06 | chr2:191073180                |       |        |         | 1.10       | 1.05E-06 |         |                  |  |             |  |
| chr16                  | 85982485  | rs9939427   | A  | G  | 1.03   | 0.44    | 1.06   | 0.09    | 1.03   | 0.62    | 1.22   | 0.01    | 1.03   | 0.54    | 1.06   | 0.23    | 1.06   | 4.8E-03 | chr16:88981246                |       |        |         | 1.06       | 4.6E-03  |         |                  |  |             |  |
| chr16                  | 88981246  | rs62045818  | C  | T  | 1.00   | 0.97    | 1.00   | 0.87    | 1.01   | 0.90    | 1.08   | 0.27    | 1.03   | 0.59    | 0.95   | 0.21    | 1.00   | 0.93    | chr16:85982485                |       |        |         | 1.00       | 0.93     |         |                  |  |             |  |
| chr19                  | 10352442  | rs34536443  | C  | G  | 0.85   | 0.10    | 0.78   | 9.3E-04 | 0.97   | 0.81    | 0.56   | 2.0E-03 | 0.71   | 4.1E-03 | 0.84   | 0.12    | 0.80   | 4.0E-07 | chr19:10354167,chr19:10359299 |       |        |         | 0.81       | 1.61E-06 |         |                  |  |             |  |
| chr19                  | 10354167  | rs35018800  | A  | G  | 1.12   | 0.51    | 0.69   | 0.01    | 0.90   | 0.61    | 0.55   | 0.09    | 0.83   | 0.45    | 0.95   | 0.82    | 0.84   | 0.04    | chr19:10352442,chr19:10359299 |       |        |         | 0.86       | 0.07     |         |                  |  |             |  |
| chr19                  | 10359299  | rs12720356  | C  | A  | 0.97   | 0.64    | 0.93   | 0.21    | 0.85   | 0.12    | 0.86   | 0.20    | 0.82   | 8.7E-03 | 0.84   | 0.01    | 0.89   | 1.7E-04 | chr19:10352442,chr19:10354167 |       |        |         | 0.90       | 0.00     |         |                  |  |             |  |

\*See Supplementary Tables 1-2.
