# Supplementary material for: Multiomics analysis of rheumatoid arthritis yields sequence variants that have large effects on risk of the seropositive subset
Source: PubMed Central journal article supplement — Ann Rheum Dis. 2022 Apr 25;81(8):1085–95. doi: 10.1136/annrheumdis-2021-221754 (PMC9279832; doi:10.1136/annrheumdis-2021-221754), 2022-04-25
Supplement: annrheumdis-2021-221754supp016.pdf [file annrheumdis-2021-221754supp016.pdf]

**Supplementary Table 9. Genetic correlation between RA subsets\***

| <b>Denmark-Iceland-Finland</b><br>(15,976 cases & 554,675 controls) | <b>Norway-Sweden-UK</b><br>(15,337 cases & 440,702 controls) | <b>rg</b>   | <b>se</b>    | <b>P</b>       |
|---------------------------------------------------------------------|--------------------------------------------------------------|-------------|--------------|----------------|
| RA overall                                                          | RA overall                                                   | 0.99        | 0.06         | <i>1.1E-55</i> |
| Seropositive RA                                                     | Seropositive RA                                              | 1.03        | 0.08         | <i>7.6E-39</i> |
| Seronegative RA                                                     | Seronegative RA                                              | 1.09        | 0.53         | <i>0.038</i>   |
| RA overall                                                          | Seropositive RA                                              | 0.91        | 0.07         | <i>1.3E-35</i> |
| Seropositive RA                                                     | RA overall                                                   | 1.05        | 0.07         | <i>1.7E-54</i> |
|                                                                     | <b>META</b>                                                  | <b>0.98</b> | <b>0.049</b> | <b>6.5E-88</b> |
| RA overall                                                          | Seronegative RA                                              | 1.39        | 0.61         | <i>0.022</i>   |
| Seronegative RA                                                     | RA overall                                                   | 0.93        | 0.12         | <i>1.1E-14</i> |
|                                                                     | <b>META</b>                                                  | <b>0.95</b> | <b>0.12</b>  | <b>1.0E-15</b> |
| Seropositive RA                                                     | Seronegative RA                                              | 1.34        | 0.57         | <i>0.019</i>   |
| Seronegative RA                                                     | Seropositive RA                                              | 0.85        | 0.13         | <i>5.1E-11</i> |
|                                                                     | <b>META</b>                                                  | <b>0.87</b> | <b>0.13</b>  | <b>4.5E-12</b> |

\*The study population was divided into two groups of similar size, and the correlation of subsets made between the two. We estimated the genetic correlation between RA subtypes using cross-trait LD score regression. In this analysis, we used results for about 1.2 million well imputed variants, and for LD information we used precomputed LD scores for European populations. To avoid bias due to overlapping samples, we calculated the genetic correlation between a meta-analysis of Danish, Icelandic and Finnish datasets and a meta-analysis of Norwegian, Swedish and UK datasets for the different RA subtypes. The results of the two analyses were subsequently meta-analysed.
